# Supplementary material for: Tinamiphilopsis temmincki sp. n., a New Quill Mite Species from Tataupa Tinamou, and the Early History of Syringophilid Mites
Source: MDPI journal article supplement (doi:10.3390/ani13172728), 2023-08-28
Supplement: s1 [file s1]

**Supplementary Table S1.** List of characters used in the phylogenetic analysis of the primitive syringophilid genera (genera with a full complement of body and leg setae).

| No. | Character                                                                                                                                                                       |
|-----|---------------------------------------------------------------------------------------------------------------------------------------------------------------------------------|
| 1   | Basal part of gnathosoma: not submerged (0); deeply submerged into idiosoma (1)                                                                                                 |
| 2   | Stylophore apodeme: indistinct (0); distinctly developed (1)                                                                                                                    |
| 3   | Palpal tibia and tarsus: separated (0); fused (1)                                                                                                                               |
| 4   | Claw-like seta of palps: present (0); absent (1)                                                                                                                                |
| 5   | Posterior part of stylophore: constricted (0); rounded (1)                                                                                                                      |
| 6   | Projection on posterior part of stylophore: absent (0); present (1)                                                                                                             |
| 7   | Hypostomal apex: unornamented (0); ornamented (1)                                                                                                                               |
| 8   | Hypostomal protuberances: one pair small and blunt-ended (0); one pair small and sharp-ended (1); two pairs (2); one pair large (3)                                             |
| 9   | Size of hypostomal lips: small (0); large (1)                                                                                                                                   |
| 10  | Hypostomal lips: equal (0); unequal (1)                                                                                                                                         |
| 11  | Lateral branch of peritreme: normal i.e., 6-10 chambers (0); reduced i.e., 1-5 chambers (1); supernumerary i.e., 11-20 chambers (2)                                             |
| 12  | Distal tip of chelicerae: edentate (0); dentate (1)                                                                                                                             |
| 13  | Propodonotal shield: strongly sclerotized (0); weakly sclerotized (1)                                                                                                           |
| 14  | Hysteronotal shield: present (0); absent (1)                                                                                                                                    |
| 15  | Hysteronotal shield: entire (0); divided (1)                                                                                                                                    |
| 16  | Hysteronotal shield: reach level of setae <i>d2</i> (0); not reach <i>d2</i> (1)                                                                                                |
| 17  | Pygidial shield: present (0); absent (1)                                                                                                                                        |
| 18  | Hysteronotal and pygidial shields: fused (0); not fused (1)                                                                                                                     |
| 19  | Position of setae <i>vi</i> and <i>ve</i> : at same level (0); <i>vi</i> anterior to <i>ve</i> (1)                                                                              |
| 20  | Position of setae <i>c1</i> and <i>se</i> : at same level (0); not at same level (1)                                                                                            |
| 21  | Position of setae <i>se</i> and <i>c2</i> : <i>se</i> posterior to <i>c2</i> (0); <i>se</i> and <i>c2</i> at same level (1)                                                     |
| 22  | Position of setae <i>c2</i> : out of shield (0); on shield (1)                                                                                                                  |
| 23  | Ornamentation of idiosomal setae: present (0); absent (1)                                                                                                                       |
| 24  | Setae <i>e1</i> : present (0); absent (1)                                                                                                                                       |
| 25  | Position of setae <i>f1</i> and <i>f2</i> : <i>f1</i> close to <i>f2</i> (0); <i>f2</i> far from <i>f1</i> (1)                                                                  |
| 26  | Setae <i>ps3</i> : present (0); absent (1)                                                                                                                                      |
| 27  | Genital setae: short (0); long (1); medium (2)                                                                                                                                  |
| 28  | Position of setae <i>ag1</i> and <i>ag2</i> : <i>ag2</i> postero lateral to <i>ag1</i> (0); <i>ag2</i> posterior to <i>ag1</i> (1); <i>ag1</i> and <i>ag2</i> at same level (2) |
| 29  | Neotrichious aggenital setae: absent (0); present (1)                                                                                                                           |
| 30  | Seta <i>a'</i> on tarsus I: present (0); absent (1)                                                                                                                             |
| 31  | Proral setae <i>p'</i> and <i>p''</i> : rod-like (0); fan-like (1)                                                                                                              |
| 32  | Number of tines in proral setae: reduced i.e., 4-10 tines (0); normal i.e., 11-20 tines (1); supernumerary 21-35 tines (2)                                                      |
| 33  | Setae <i>4a</i> : present (0); absent (1)                                                                                                                                       |
| 34  | Seta <i>vs</i> on tarsus III: present (0); absent (1)                                                                                                                           |
| 35  | Seta <i>vs</i> on tarsus IV: present (0); absent (1)                                                                                                                            |
| 36  | Seta <i>dG</i> on genu IV: present (0); absent (1)                                                                                                                              |
| 37  | Seta <i>vF</i> on femur III: present (0); absent (1)                                                                                                                            |
| 38  | Seta <i>v</i> on trochanter III: present (0); absent (1)                                                                                                                        |
| 39  | Legs I and II: subequal in thickness (0); I thicker than II (1)                                                                                                                 |
| 40  | Legs I and II: I longer than II (0); I and II subequal in length (1)                                                                                                            |
| 41  | Coxal fields I-II and III-IV: grouped together (0); widely separated (1)                                                                                                        |
| 42  | Apodemes I and II: similar in shape (0); different in shape (1)                                                                                                                 |
| 43  | Apodemes I: divergent (0); parallel (1)                                                                                                                                         |
| 44  | Divergence of apodemes I: strongly divergent (0); slightly divergent (1)                                                                                                        |
| 45  | Apodemes I and II: fused (0); not fused (1)                                                                                                                                     |
| 46  | Apodemes III and IV: present (0); absent (1)                                                                                                                                    |
| 47  | Claw basal angle: absent (0); present (1)                                                                                                                                       |
| 48  | Position of setae <i>3a</i> and <i>3b</i> : at same level (0); <i>3a</i> anterior to <i>3b</i> (1)                                                                              |
| 49  | Body size: large i.e., more than 1000 (0); medium i.e., 700-990 (1); small i.e., less than 690 (2)                                                                              |

## Supplementary Table S2. Data matrix

|                                         | 1                                                 | 2 | 3 | 4 |
|-----------------------------------------|---------------------------------------------------|---|---|---|
|                                         | 1234567890123456789012345678901234567890123456789 |   |   |   |
| <i>Cheyletus eruditus</i>               | 0000--0-00000000010000100000010-00000000000010000 |   |   |   |
| <i>Cheletopsis norneri</i>              | 0000--0-000001--1-0101100000010-00000000000010000 |   |   |   |
| <i>Aulobia dendroicae</i>               | 1111100-11200001011000010100001011111101111-11011 |   |   |   |
| <i>Aulobia cardueli</i>                 | 1111100-11200001011000010100001011111101111-11011 |   |   |   |
| <i>Blaszakia rossae</i>                 | 1111100-0000000001120011110100101111111110111012  |   |   |   |
| <i>Bubophilus aegolius</i>              | 1111000-00110001011000010101001111111101110111011 |   |   |   |
| <i>Charadriphilus ludmilae</i>          | 1111000-00200000011200111101001011111101110111012 |   |   |   |
| <i>Charadriphilus ralli</i>             | 1111000-01000000011210111101001011111101110111012 |   |   |   |
| <i>Colinophilus wilsoni</i>             | 1111000-0021000001120001010100111111111110111010  |   |   |   |
| <i>Corvitorotrogus alpha</i>            | 111100110001000101110101010-101111111101110001010 |   |   |   |
| <i>Creagonycha totani</i>               | 1111000-000111--0-1101010101001111111101100011000 |   |   |   |
| <i>Crotophagisyringophilus io</i>       | 11110011002101--0-1102010101001111111101110101010 |   |   |   |
| <i>Ixobrychiphilus wallacei</i>         | 1111000-00111001001100010101001011111101111-11012 |   |   |   |
| <i>Kalamotrypates cracidus</i>          | 1111110-00000000011200010100001011111111110111012 |   |   |   |
| <i>Megasyringophilus eos</i>            | 11110012001101--1-1101011100001111111101110010100 |   |   |   |
| <i>Megasyringophilus trichoglossus</i>  | 1111001?00010001011102011110001111111101110010100 |   |   |   |
| <i>Megasyringophilus aquilus</i>        | 1111001100010001011102011100001211111101110010100 |   |   |   |
| <i>Pteroclidisyringophilus otididus</i> | 1111000-00100001011300010100001111111101110111012 |   |   |   |
| <i>Pteroclidisyringophilus re</i>       | 1111000-00100000011210010100001111111101110111012 |   |   |   |
| <i>Selenonycha charadriiformicus</i>    | 1111101-00010001011101011101001111111101100010000 |   |   |   |
| <i>Syringophilopsis turdi</i>           | 11110012002101--0-1101010102001011111101110001010 |   |   |   |
| <i>Syringophilopsis muscicapicus</i>    | 1111001200210011001101010101001011111101110001010 |   |   |   |
| <i>Syringophilus bipectinatus</i>       | 1111000-00000000011310010100001111111101110101011 |   |   |   |
| <i>Tinamiphilopsis ariconte</i>         | 1111010-00010000011300010101001111111101110111012 |   |   |   |
| <i>Tinamiphilopsis elegans</i>          | 1111010-00010000011300010101001111111101110111012 |   |   |   |
| <i>Tinamiphilopsis temmincki</i>        | 1111010-00010000011300010101001111111101110111012 |   |   |   |
| <i>Torotrogla meulae</i>                | 111100130001001100110101010-101111111101100011011 |   |   |   |
| <i>Torotrogla lusciniae</i>             | 11110013000101--0-110101010-101111111101100010011 |   |   |   |
| <i>Trypetoptila casmerodia</i>          | 1111011???0101--0-100001011-101210111101110001010 |   |   |   |
